# Supplementary material for: Core–shell Cd0.2Zn0.8S@BiOX (X = Cl, Br and I) microspheres: a family of hetero-structured catalysts with adjustable bandgaps, enhanced stability and photocatalytic performance under visible light irradiation
Source: Royal Society of Chemistry journal article supplement (doi:10.1039/c6dt02038k), 2016-01-01
Supplement: c6dt02038k1.pdf [file c6dt02038k1.pdf]

Supporting Information for:

**Core-Shell  $\text{Cd}_{0.2}\text{Zn}_{0.8}\text{S}@\text{BiOX}$  (X = Cl, Br, I) Microspheres: A Family of Hetero-Structured Catalysts with Adjustable Bandgaps, Enhanced Stability and Photocatalytic Performance under Visible Light Irradiation**

Yannan Zhou,<sup>a,b</sup> Ting Wen,<sup>a,b</sup> Binbin Chang,<sup>a,b</sup> Baocheng Yang<sup>\*a,b</sup> and Yonggang Wang<sup>\*c</sup>

<sup>a</sup>Institute of Nanostructured Functional Materials, Huanghe Science and Technology College, Zhengzhou, Henan 450006, China.

<sup>b</sup>Henan Provincial Key Laboratory of Nano-composite and Applications, Zhengzhou 450006, Henan Province, China.

<sup>c</sup>High Pressure Science and Engineering Center, University of Nevada Las Vegas, Nevada 89154, United States.

**\*Emails:** baochengyang@hhstu.infmm.cn (B. Yang); yyggwang@gmail.com (Y. Wang).

**Figures caption:**

*Fig.S1* SEM images of pristine BiOX (a:BiOCl, b: BiOBr, and c: BiOI).

*Fig.S2* EDX results of CZS and CZS@BiOX (a: CZS, b: CZS@BiOCl, c: CZS@BiOBr, and d: CZS@BiOI) samples.

*Fig.S3* TEM images of BiOX (a: BiOCl, b: BiOBr, and c: BiOI). Scale bar: 500 nm.

*Fig.S4* TEM images of 1:1 CZS@BiOX: CZS@BiOCl (a), CZS@BiOBr (b), CZS@BiOI (c); 1:5 CZS@BiOX: CZS@BiOCl (d), CZS@BiOBr (e), CZS@BiOI (f).

Scale bar: 500 nm.

*Fig.S5* PL spectra of CZS, BiOX and CZS@BiOX ( $X = \text{Cl, Br, I}$ ).

*Fig.S6* Decomposition pathway for RhB under light irradiation.

*Fig.S7* Photocatalytic degradation of RhB on blank, CZS and BiOX ( $X = \text{Cl, Br, I}$ ) under visible-light irradiation.

**Table S1** Comparison of the morphologies and photocatalytic activities of BiOX ( $X = \text{Cl, Br, I}$ ) between current synthesis method and previous reports.

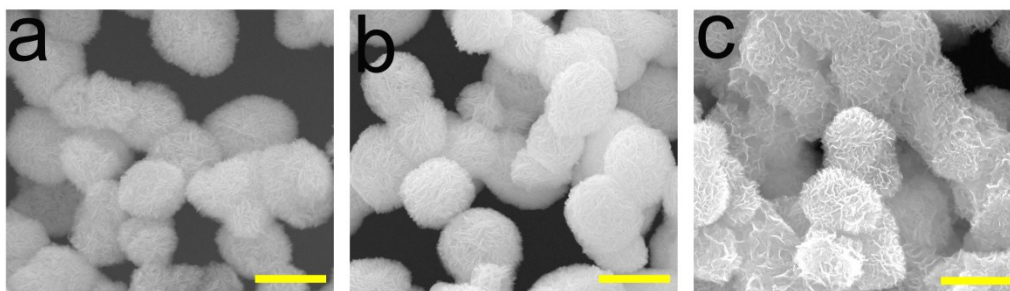

*Fig.S1* SEM images of pristine BiOX (a: BiOCl, b: BiOBr, and c: BiOI). Scale bar: 1  $\mu$ m.

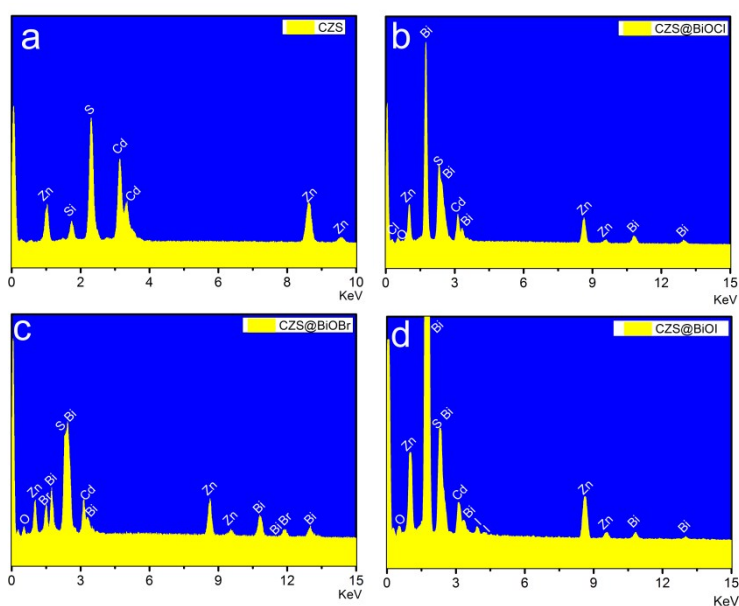

*Fig.S2* EDX results of CZS and CZS@BiOX (a: CZS, b: CZS@BiOCl, c: CZS@BiOBr, and d: CZS@BiOI) samples.

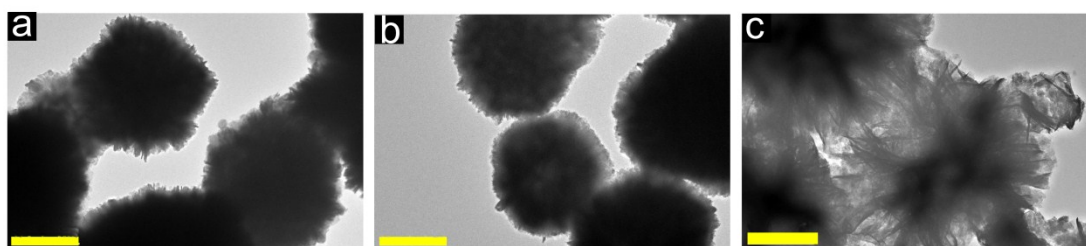

*Fig.S3* TEM images of BiOX (a: BiOCl, b: BiOBr, and c: BiOI). Scale bar: 500 nm.

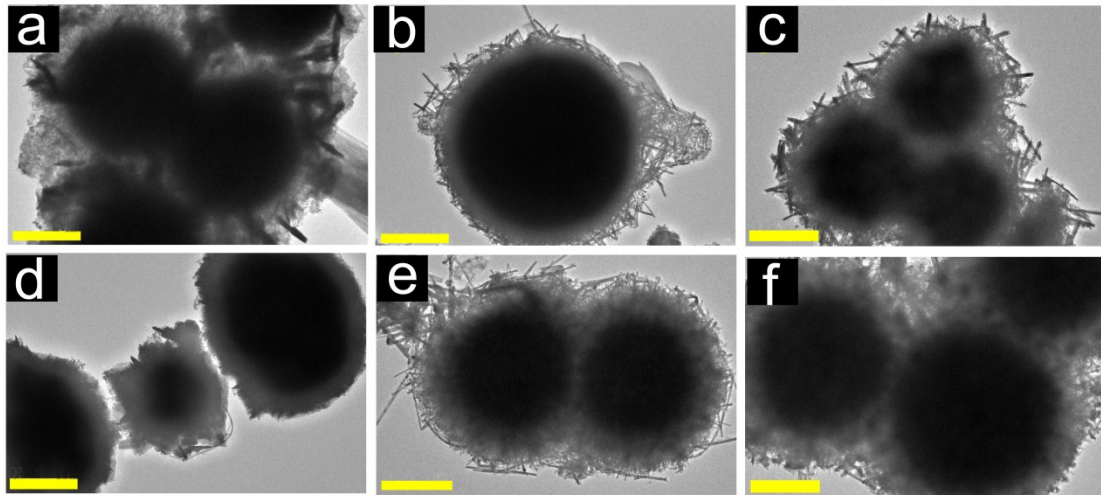

Fig.S4 TEM images of 1:1 CZS@BiOX: CZS@BiOCl (a), CZS@BiOBr (b), CZS@BiOI (c); 1:5 CZS@BiOX: CZS@BiOCl (d), CZS@BiOBr (e), CZS@BiOI (f). Scale bar: 500 nm.

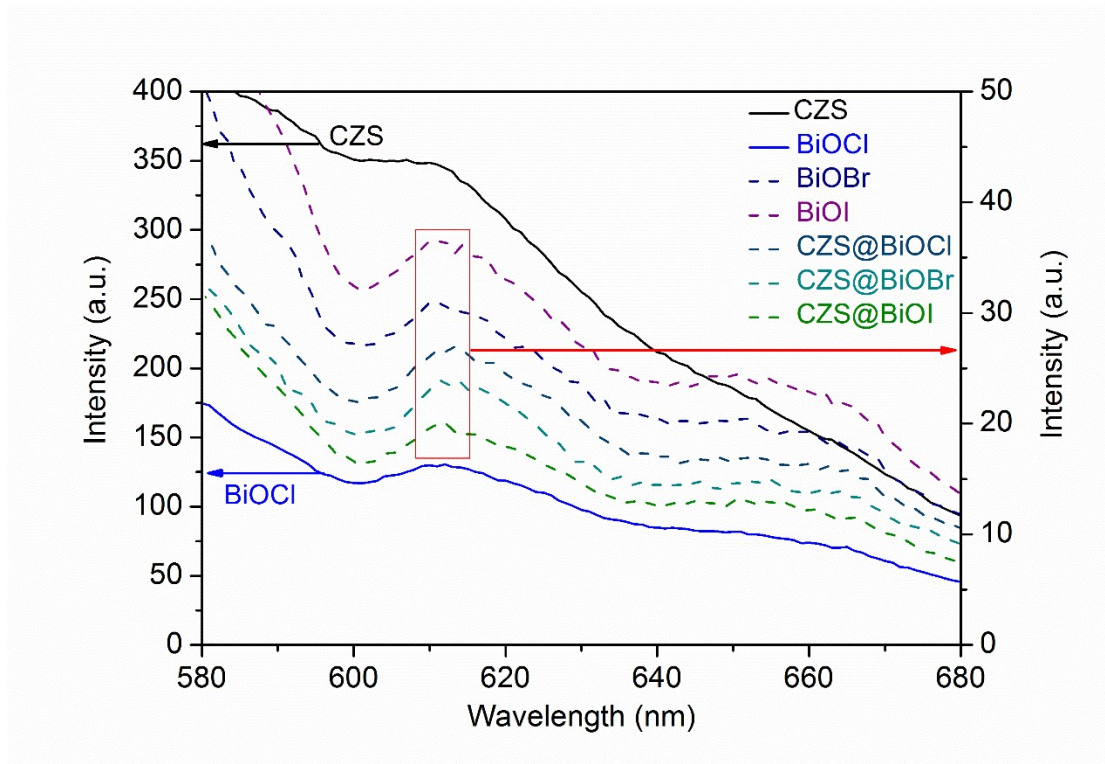

Fig.S5 PL spectra of CZS, BiOX and CZS@BiOX ( $X = \text{Cl}, \text{Br}, \text{I}$ ).

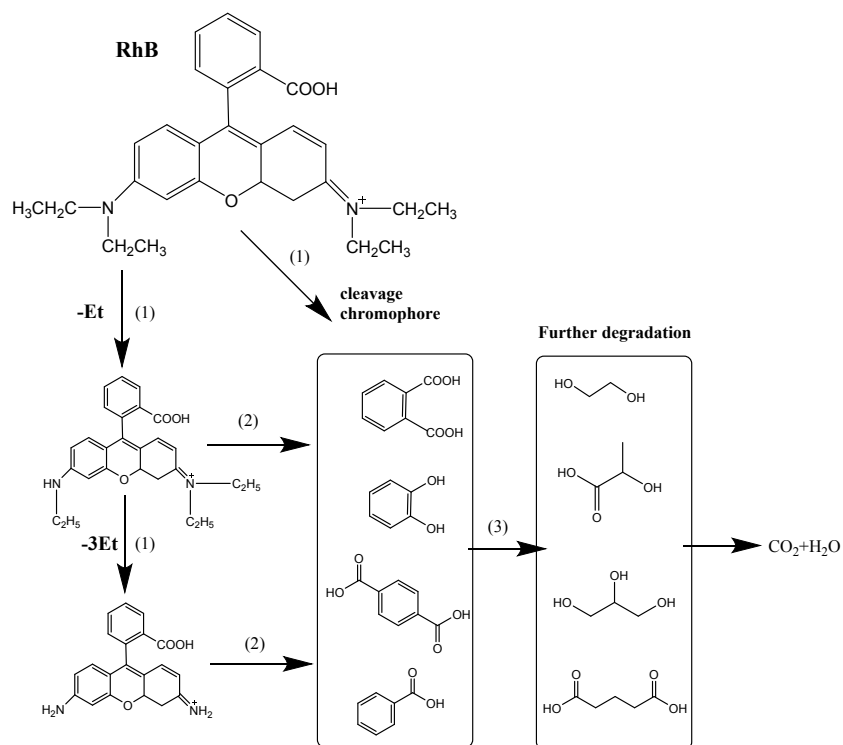

Fig.S6 Decomposition pathway for RhB under light irradiation.

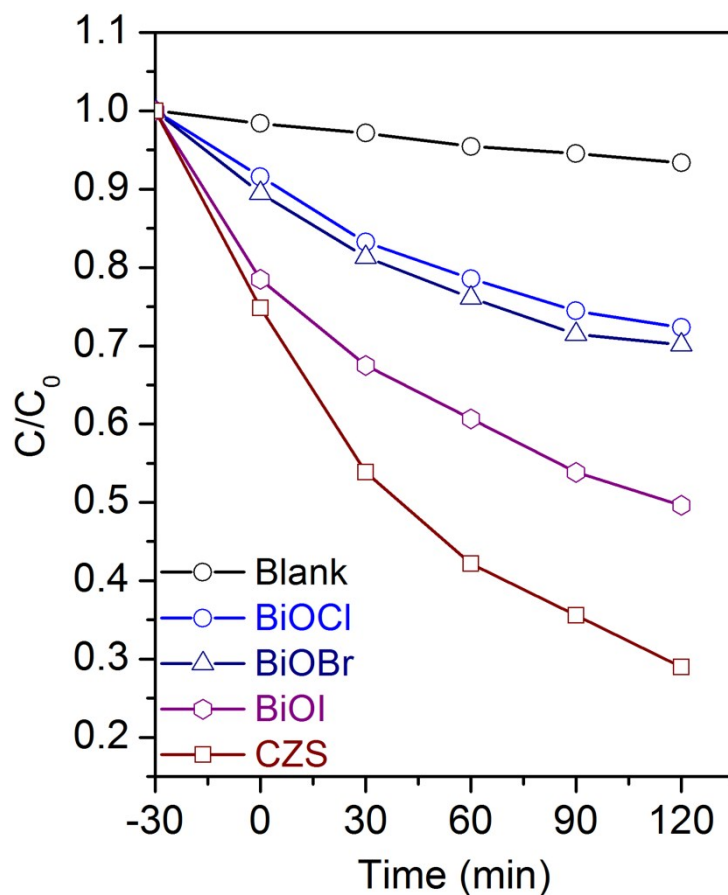

Fig.S7 Photocatalytic degradation of RhB on blank, CZS and BiOX ( $X = \text{Cl}, \text{Br}, \text{I}$ ) under visible-light irradiation.

**Table S1** Comparison of the morphologies and photocatalytic activities of BiOX ( $X = \text{Cl}, \text{Br}, \text{I}$ ) between current synthesis method and previous reports.

| Synthesis method                             | Morphology        | $S_{\text{BET}}$ ( $\text{m}^2/\text{g}$ ) | Catalytic activity | Ref       |
|----------------------------------------------|-------------------|--------------------------------------------|--------------------|-----------|
| Precipitation;<br>Room temperature.          | Plates            | BiOCl:12.1<br>BiOBr: 14.3<br>BiOI: 13.4    | BiOCl<BiOI<BiOBr   | 1         |
| Solvothermal;<br>Ethylene glycol;<br>150 °C. | Plates            | BiOI: 6.72<br>BiOCl:15.99                  | BiOI<BiOCl         | 2         |
| Solvothermal;<br>Ethylene glycol;<br>160 °C. | Irregular spheres | BiOBr:12.03<br>BiOI:56.29                  | BiOBr<BiOI         | 3         |
| Solvothermal;<br>Ethylene glycol;<br>160 °C. | Porous spheres    | BiOCl:30.35,<br>BiOBr:43.82<br>BiOI:70.15  | BiOCl<BiOBr<BiOI   | This work |

**Reference:**

1. L. Chen, R. Huang, M. Xiong, Q. Yuan, J. He, J. Jia, M. Yao, S. Luo, C. Au and S. Yin, *Inorg. Chem.*, 2013, 52, 11118–11125.
2. T. Li, G. Chen, C. Zhou, Z. Shen, R. Jin and J. Sun, *Dalton Trans.*, 2011, 40, 6751–6758.
3. Z. Jia, F. Wang, F. Xin and B. Zhang, *Ind. Eng. Chem. Res.*, 2011, 50, 6688–6694.
